# Supplementary material for: Separation performance of p-tert-butyl(tetradecyloxy)calix[6]arene as a stationary phase for capillary gas chromatography
Source: Royal Society of Chemistry journal article supplement (doi:10.1039/c9ra07798g), 2019-01-01
Supplement: c9ra07798g1.pdf [file c9ra07798g1.pdf]

## Supporting information

### **Separation performance of *p*-tert-butyl(tetradecyloxy)calix[6]arene as stationary phase for capillary gas chromatography**

**Tao Sun<sup>a\*</sup>, Xiaomin Shuai<sup>b</sup>, Yujie Chen<sup>a</sup>, Xinyu Zhao<sup>a</sup>, Qianqian Song<sup>a</sup>, Kaixin Ren<sup>a</sup>, Xingxing Jiang<sup>a</sup>, Shaoqiang Hu<sup>a</sup>, and Zhiqiang Cai<sup>b\*</sup>**

*<sup>a</sup> College of Chemistry and Chemical Engineering, Henan Key Laboratory of Function-Oriented Porous Materials, Luoyang Normal University, Luoyang 471934, P. R. China*

*<sup>b</sup> Liaoning Province Engineering Research Center for Fine Chemical Engineering of Aromatics Downstream, School of Petrochemical Engineering, Shenyang University of Technology, Liaoyang, 111003, Liaoning, P. R. China*

\* Corresponding author.

E-mail addresses: *suntao2226@163.com, suntao@lynu.edu.cn* (T. Sun);  
*kahongzqc@163.com, czq0601@sut.edu.cn* (Z. Cai)

**Table S1** Solutes and their descriptors for determining the system constants of the stationary phases by the Abraham solvation parameter model.

| Probe solute            | E     | S    | A    | B    | L     |
|-------------------------|-------|------|------|------|-------|
| 1-bromopentane          | 0.356 | 0.4  | 0    | 0.12 | 3.611 |
| 1-bromohexane           | 0.349 | 0.4  | 0    | 0.12 | 4.13  |
| 1-bromoheptane          | 0.343 | 0.4  | 0    | 0.12 | 4.663 |
| 1-hexanol               | 0.21  | 0.42 | 0.37 | 0.48 | 3.61  |
| 1-heptanol              | 0.211 | 0.42 | 0.37 | 0.48 | 4.115 |
| 2-heptanone             | 0.123 | 0.68 | 0    | 0.51 | 3.76  |
| 2-octanone              | 0.106 | 0.68 | 0    | 0.51 | 4.257 |
| toluene                 | 0.601 | 0.52 | 0    | 0.14 | 3.325 |
| <i>n</i> -propylbenzene | 0.604 | 0.5  | 0    | 0.15 | 4.23  |
| <i>n</i> -butylbenzene  | 0.6   | 0.51 | 0    | 0.15 | 4.73  |
| 1,2-dichlorobenzene     | 0.872 | 0.78 | 0    | 0.04 | 4.518 |
| 1,2,3-trichlorobenzene  | 1.03  | 0.86 | 0    | 0    | 5.419 |
| 1,2,4-trichlorobenzene  | 0.98  | 0.81 | 0    | 0    | 5.248 |
| 1,3,5-trichlorobenzene  | 0.98  | 0.73 | 0    | 0    | 5.045 |
| <i>n</i> -nonane        | 0     | 0    | 0    | 0    | 4.182 |
| <i>n</i> -decane        | 0     | 0    | 0    | 0    | 4.686 |
| <i>n</i> -undecane      | 0     | 0    | 0    | 0    | 5.191 |
| mesitylene              | 0.649 | 0.52 | 0    | 0.19 | 4.344 |
| methyl heptanoate       | 0.072 | 0.6  | 0    | 0.45 | 4.392 |
| methyl octanoate        | 0.065 | 0.6  | 0    | 0.45 | 4.838 |
| <i>p</i> -toluidine     | 0.923 | 0.95 | 0.23 | 0.45 | 4.452 |
| <i>p</i> -chloroaniline | 1.06  | 1.13 | 0.3  | 0.32 | 4.889 |
| heptaldehyde            | 0.14  | 0.65 | 0    | 0.45 | 3.86  |
| octanal                 | 0.16  | 0.65 | 0    | 0.45 | 4.361 |
| nonanal                 | 0.15  | 0.65 | 0    | 0.45 | 4.856 |
| <i>n</i> -dodecane      | 0     | 0    | 0    | 0    | 5.696 |
| 1-octanol               | 0.199 | 0.42 | 0.37 | 0.48 | 4.619 |
| 2-nonanone              | 0.119 | 0.68 | 0    | 0.51 | 4.735 |
| benzaldehyde            | 0.82  | 1    | 0    | 0.39 | 4.008 |
| 1,3-dichlorobenzene     | 0.847 | 0.73 | 0    | 0.02 | 4.41  |
| 2,6-dimethylaniline     | 0.972 | 0.89 | 0.2  | 0.46 | 5.028 |
